# Supplementary material for: Interfaces and Oxygen Vacancies-Enriched Catalysts Derived from Cu-Mn-Al Hydrotalcite towards High-Efficient Water–Gas Shift Reaction
Source: MDPI journal article supplement (doi:10.3390/molecules28041522), 2023-02-04
Supplement: s1 [file s1]

# Supplementary Materials for

## Interfaces and Oxygen Vacancies-Enriched Catalysts Derived from Cu-Mn-Al Hydrotalcite towards High-Efficient Water-Gas Shift Reaction

Hanci Li<sup>1</sup>, Zhenyi Xiao<sup>1</sup>, Pei Liu<sup>1</sup>, Hairu Wang<sup>1</sup>, Jiajun Geng<sup>1</sup>, Huibin Lei<sup>1,2</sup>, Ou Zhuo<sup>1,2,\*</sup>

<sup>1</sup> College of Chemistry and Chemical Engineering, Jishou University, Jishou 416000, China

<sup>2</sup> Hunan Province Key Laboratory of Mineral Cleaner Production and Green Functional Materials, Jishou University, Jishou 416000, China

\* Correspondence: zhuoouhao@126.com (O.Z.)

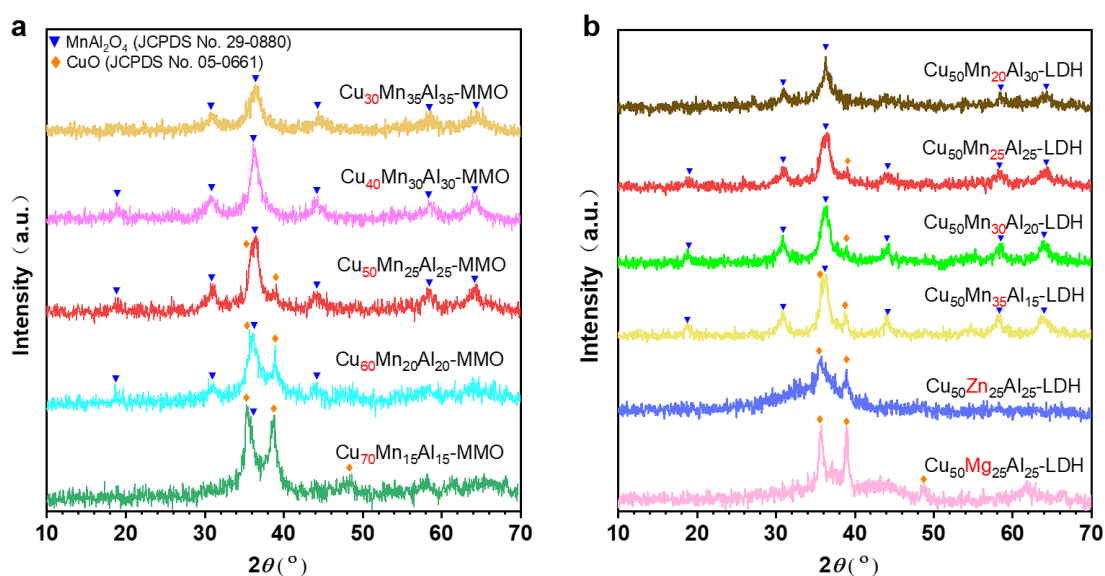

**Figure S1.** XRD patterns of the mixed metal oxides (MMO) derived from layered double hydroxides (LDH) samples.

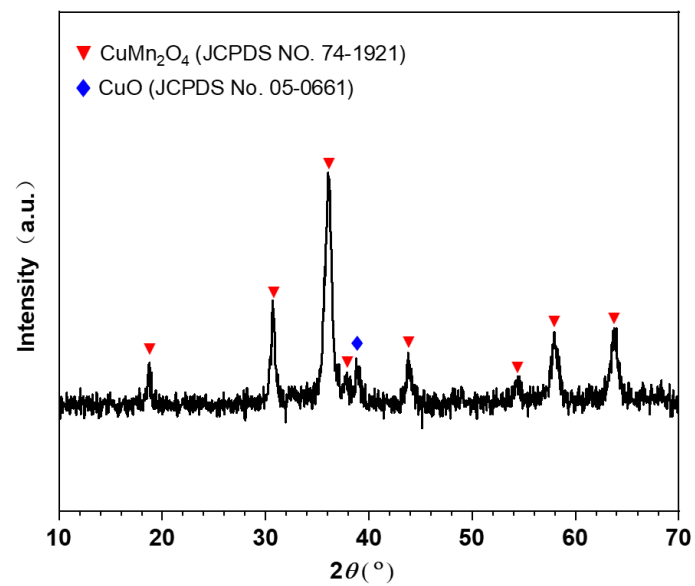

**Figure S2.** XRD pattern of the CuMn sample (calcined at 500°C for 3 h).

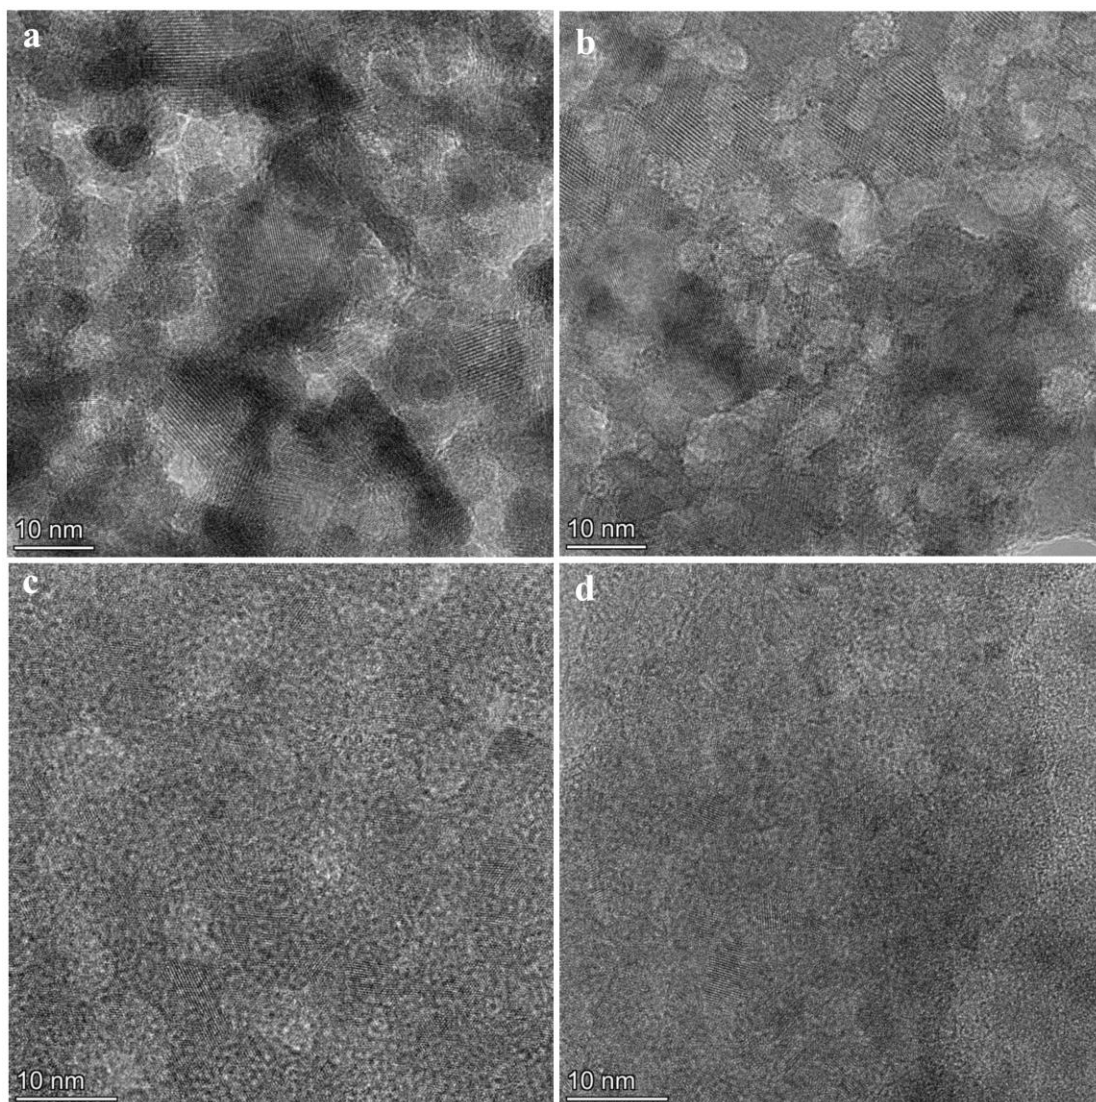

**Figure S3.** HRTEM images of the MMO samples. (a, b) Cu<sub>50</sub>Mn<sub>25</sub>Al<sub>25</sub>-MMO, (c) Cu<sub>50</sub>Zn<sub>25</sub>Al<sub>25</sub>-MMO, (d) Cu<sub>50</sub>Mg<sub>25</sub>Al<sub>25</sub>-MMO.

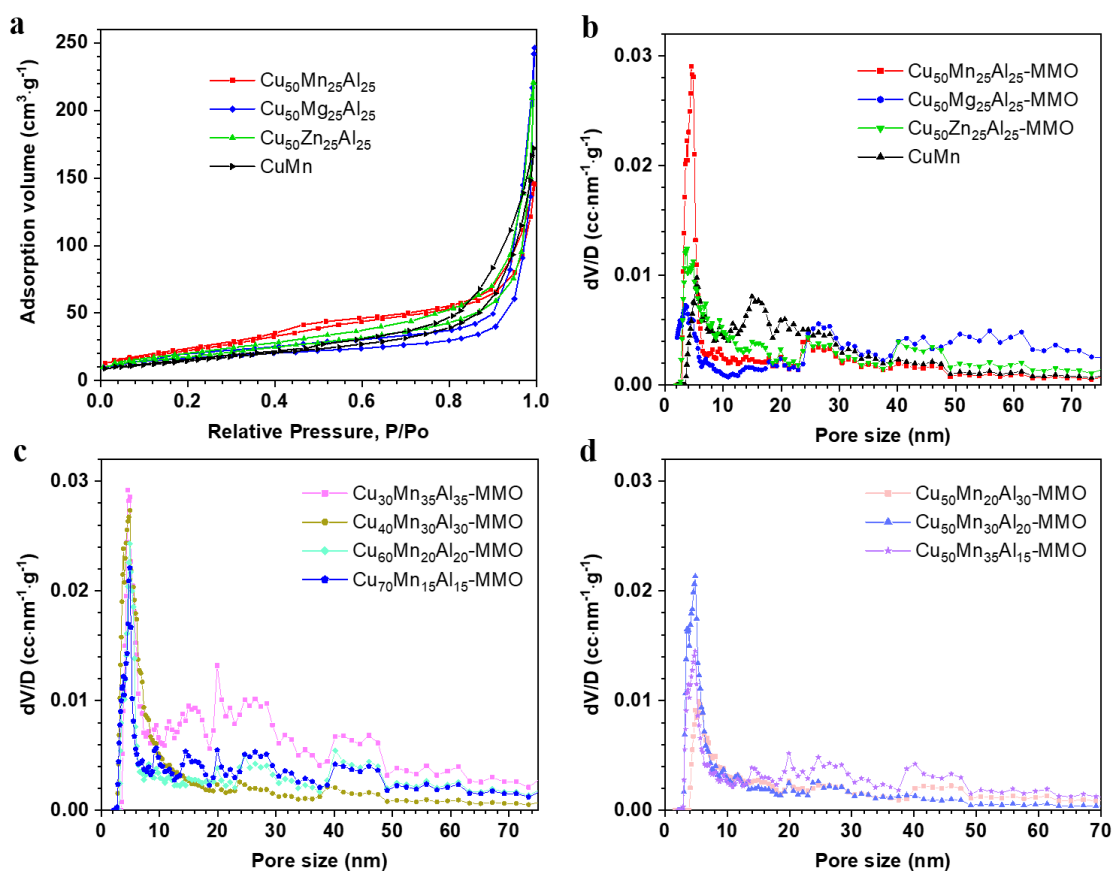

**Figure S4.**  $N_2$  adsorption/desorption isotherms (a) and pore size distributions (b-d) of the samples.

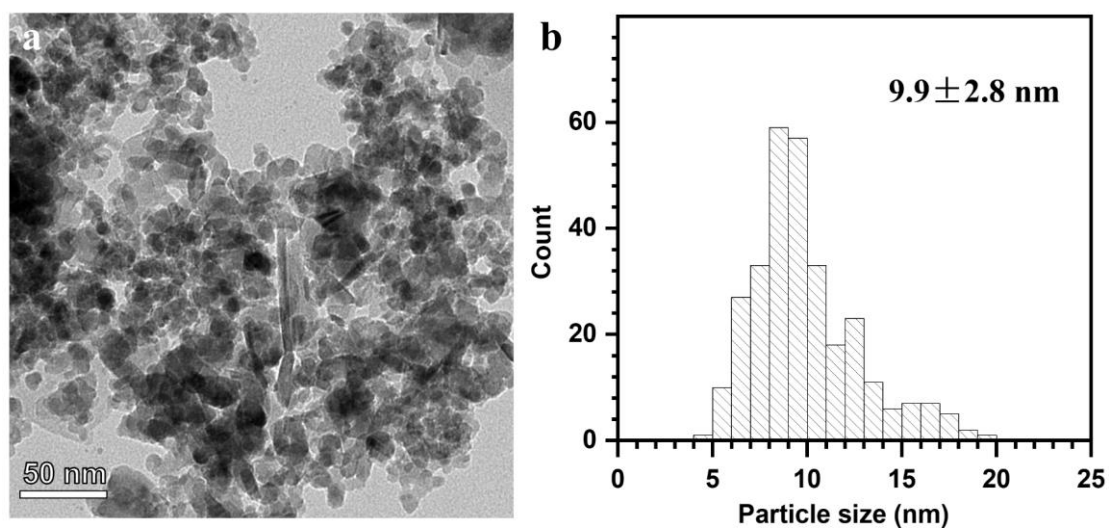

**Figure S5.** TEM image and particle size distribution for the  $\text{CuMn}$  sample.

**Table S1.** Comparison of the activities of the representative catalytic systems with non-noble metal for the WGS reaction

| Catalysts                                               | $T$ (K) | Gas feed<br>(CO : H <sub>2</sub> : CO <sub>2</sub> ) | CO/H <sub>2</sub> O<br>ratio | WHSV<br>(mL·g <sub>cat</sub> <sup>-1</sup> ·h <sup>-1</sup> ) | CO conversion<br>(%) | Reaction rate <sup>a</sup><br>(μmol <sub>CO</sub> <sup>-1</sup> ·g <sub>cat</sub> <sup>-1</sup> ·s <sup>-1</sup> ) | Ref.                                                                                   |
|---------------------------------------------------------|---------|------------------------------------------------------|------------------------------|---------------------------------------------------------------|----------------------|--------------------------------------------------------------------------------------------------------------------|----------------------------------------------------------------------------------------|
| Cu <sub>50</sub> Mn <sub>25</sub> Al <sub>25</sub> -MMO | 473     | 14.9%:27.2%:7.3%                                     | 1 : 4                        | 24000                                                         | <b>29.2</b>          | <b>12.9</b>                                                                                                        | This work                                                                              |
|                                                         | 573     | 14.9%:27.2%:7.3%                                     | 1 : 4                        | 24000                                                         | <b>96.1</b>          | <b>42.6</b>                                                                                                        |                                                                                        |
| Cu <sub>50</sub> Mn <sub>30</sub> Al <sub>20</sub> -MMO | 473     | 14.9%:27.2%:7.3%                                     | 1 : 4                        | 24000                                                         | <b>30.3</b>          | <b>13.4</b>                                                                                                        |                                                                                        |
|                                                         | 573     | 14.9%:27.2%:7.3%                                     | 1 : 4                        | 24000                                                         | <b>95.8</b>          | <b>42.5</b>                                                                                                        |                                                                                        |
| Commercial<br>Cu/ZnO/Al <sub>2</sub> O <sub>3</sub>     | 550     | 5% : 0 : 0                                           | 1 : 2                        | 36000                                                         | <b>50</b>            | <b>12</b>                                                                                                          | Zhang, Z., et al. <i>Nature Communications</i> , 2017, 8, 488.                         |
| 20Cu5Fe/SiO <sub>2</sub>                                | 603     | 2.5% : 0 : 0                                         | 1 : 1                        | -                                                             | -                    | <b>~3.6</b>                                                                                                        | Zhu M., et al. <i>Angew. Chem. Int. Ed.</i> , 2019, 58, 9083.                          |
| Cu-Mg <sub>H</sub> Al <sub>H</sub>                      | 523     | 19% : 0 : 0                                          | 1 : 3                        | 5520                                                          | <b>97.3</b>          | <b>12.7</b>                                                                                                        | Lee C. H., et al. <i>Renewable and Sustainable Energy Reviews</i> , 2021, 145, 111064. |
| Cu <sub>0.3</sub> Fe <sub>0.7</sub> O <sub>x</sub>      | 473     | 2.2% : 0 : 0                                         | 1 : 7                        | 42000                                                         | <b>~73</b>           | <b>~8.3</b>                                                                                                        | Yan H., et al. <i>Applied Catalysis B: Environmental</i> , 2018, 226, 182.             |
| MgCuCe catalyst                                         | 573     | 6.3%:37.5%:6.3%                                      | 1 : 6                        | 120000                                                        | <b>~66</b>           | <b>83</b>                                                                                                          | Jin S., et al. <i>Applied Catalysis B: Environmental</i> , 2021, 284, 119701.          |
| Inverse CeO <sub>2</sub> /Cu<br>catalyst                | 573     | 2% : 0 : 0                                           | 1 : 5                        | -                                                             | -                    | <b>47.3</b>                                                                                                        | Yan, H., et al. <i>Nature Communications</i> , 2019, 10, 3470.                         |

$T$  is the reaction temperature. <sup>a</sup> Micromoles of CO per grams of catalyst per second.

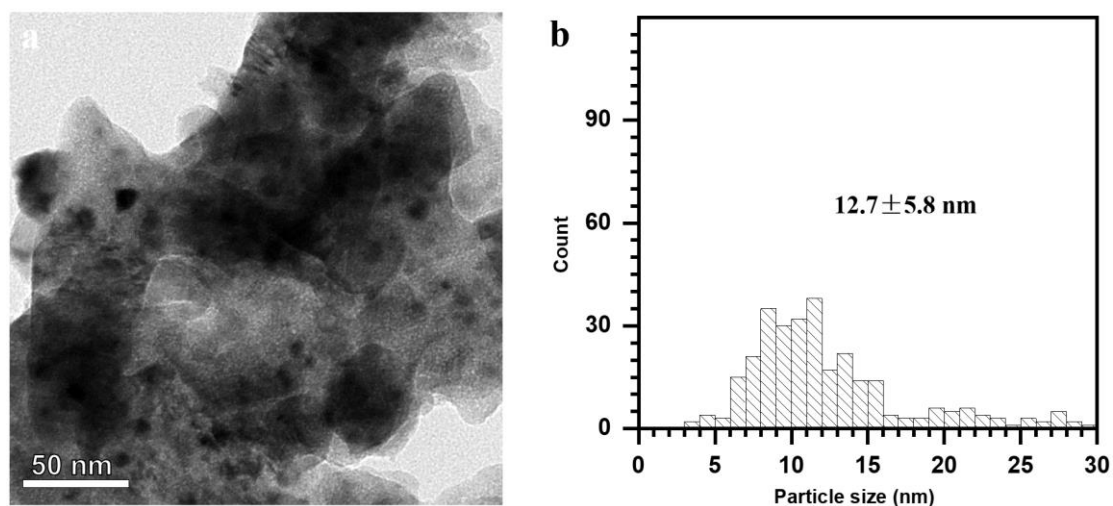

**Figure S6.** TEM image and particle size distribution for the CuMn catalyst after 5 h on stream in WGS reaction.

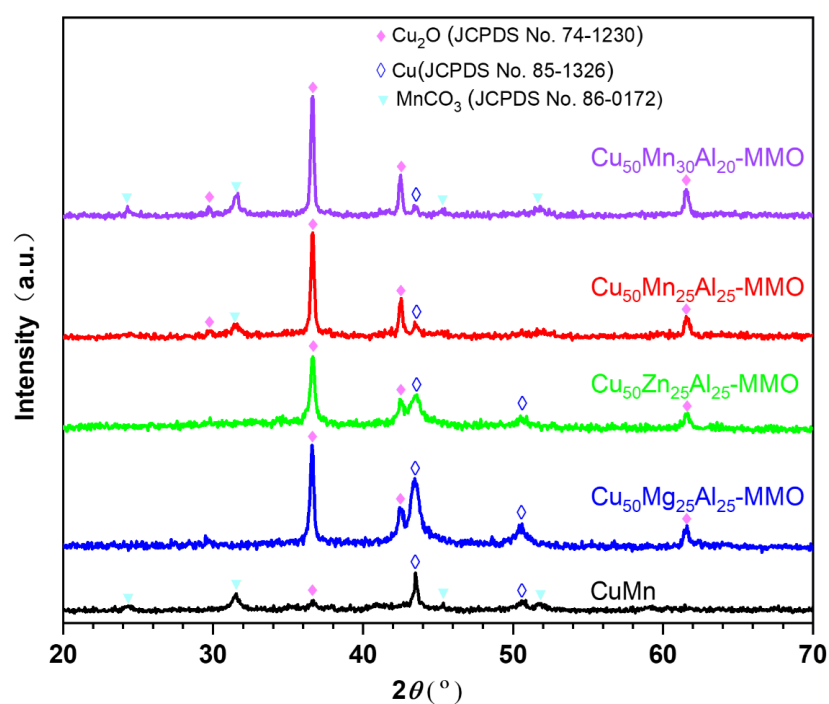

**Figure S7.** XRD pattern of the spent catalysts in WGS reaction for 5 h.

**Table S2.** The melting point, Hüttig temperature and Tamman temperature of manganese oxides <sup>a</sup>.

| Oxides                         | Melting point <sup>b</sup><br>( $T_{\text{melt}}$ ) | Hüttig temperature<br>( $T_{\text{Hüt}}$ ) | Tamman temperature<br>( $T_{\text{Tam}}$ ) |
|--------------------------------|-----------------------------------------------------|--------------------------------------------|--------------------------------------------|
| MnO                            | 2218 K (1945 °C)                                    | 665 K (392 °C)                             | 1109 K (836 °C)                            |
| Mn <sub>3</sub> O <sub>4</sub> | 1840 K (1567 °C)                                    | 552 K (279 °C)                             | 920 K (647 °C)                             |
| M <sub>2</sub> O <sub>3</sub>  | 1213 K (940 °C)                                     | 364 K (91 °C)                              | 607 K (334 °C)                             |
| MnO <sub>2</sub>               | 808 K (535 °C)                                      | 242 K (-31 °C)                             | 404 K (131 °C)                             |
| MnCO <sub>3</sub>              | - (decompose)                                       | -                                          | -                                          |
| Cu                             | 1356 K (1083 °C)                                    | 407 K (134 °C)                             | 678 K (405 °C)                             |
| Cu <sub>2</sub> O              | 1508 K (1235 °C)                                    | 452 K (179 °C)                             | 754 K (481 °C)                             |
| CuO                            | 1719 K (1446 °C)                                    | 516 K (243 °C)                             | 860 K (587 °C)                             |

<sup>a</sup> The Hüttig temperature and Tamman temperature are calculated from the corresponding melting point using the following equations:  $T_{\text{Hüt}} = 0.3T_{\text{melt}}$ ,  $T_{\text{Tam}} = 0.5T_{\text{melt}}$ . The temperature used in the calculation process is absolute temperature. <sup>b</sup> The melting point is obtained from the following literatures: Navasery M., et al. *Modern Physics Letters B*, 2012, 26(6), 1150039; Moiseev G. K., et al. *Inorganic Materials*, 2006, 42, 632; Kosenko A. V., et al. *Journal of Phase Equilibria*, 2001, 22, 12.
